# Supplementary material for: Exploring the use of transcranial photobiomodulation in Parkinson's disease patients
Source: PubMed Central journal article supplement — Neural Regen Res. 2018 Oct;13(10):1738–40. doi: 10.4103/1673-5374.238613 (PMC6128061; doi:10.4103/1673-5374.238613), 2018-10
Supplement: NRR-13-1738_Suppl1.pdf [file NRR-13-1738_Suppl1.pdf]

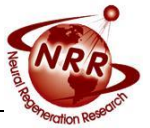

## PEER-REVIEW REPORT 1

**Name of journal:** Neural Regeneration Research

**Manuscript NO:** NRR-D-18-00315

**Title:** Exploring the use of transcranial photobiomodulation in Parkinson's disease patients

**Reviewer's Name:** Maria Antonietta Panaro

**Reviewer's country:** Italy

**Date sent for review:** 2018-05-14

**Date reviewed:** 2018-05-16

**Review time:** 2 Days

### COMMENTS TO AUTHORS

The work is very interesting and originated and can be considered for a possible publication in this journal.

Here are some suggestions to implement to the text:

- 1) A careful check of the English is required.
- 2) This last sentence can be inserted at pag. 2 line 3:

In this context it should be noted that in the literature immunomodulatory effects have been described following treatment in PD animal models with physical agents able to improve neurodegeneration associated to neuroinflammatory picture observed in course of PD (Panaro MA et al., *Neurosci Bull.* 2018 Apr;34(2):270-282).
